# Supplementary material for: Ability of known colorectal cancer susceptibility SNPs to predict colorectal cancer risk: A cohort study within the UK Biobank
Source: PubMed Central journal article supplement (PMC8443076; doi:10.1371/journal.pone.0251469), 2021-09-15
Supplement: pone.0251469.s001.pdf [file pone.0251469.s001.pdf]

**S1 Table: SNPs used to generate PRS**

| rsID       | Locus    | Effect allele | Reference allele | EAF  | Odds ratio |
|------------|----------|---------------|------------------|------|------------|
| rs6669796  | 1q25.3   | G             | C                | 0.54 | 1.05       |
| rs6687758  | 1q41     | G             | A                | 0.20 | 1.09       |
| rs72647484 | 1p36.2   | T             | C                | 0.91 | 1.21       |
| rs11903757 | 2q32.3   | C             | T                | 0.36 | 1.06       |
| rs10936599 | 3q26.2   | C             | T                | 0.75 | 1.08       |
| rs35360328 | 3p22.1   | A             | T                | 0.16 | 1.14       |
| rs812481   | 3p14.1   | G             | C                | 0.58 | 1.09       |
| rs11100443 | 4q32.2   | T             | C                | 0.09 | 1.53       |
| rs3987     | 4q26     | G             | A                | 0.44 | 1.36       |
| rs647161   | 5q31.1   | A             | C                | 0.67 | 1.11       |
| rs1321311  | 6p21.31  | A             | C                | 0.23 | 1.10       |
| rs16892766 | 8q23.3   | C             | A                | 0.07 | 1.25       |
| rs6983267  | 8q24.21  | G             | T                | 0.52 | 1.21       |
| rs719725   | 9q24     | C             | A                | 0.37 | 1.19       |
| rs10795668 | 10p14    | G             | A                | 0.67 | 1.12       |
| rs10904850 | 10p13    | G             | A                | 0.68 | 1.14       |
| rs11190164 | 10q24.2  | G             | A                | 0.29 | 1.09       |
| rs12241008 | 10q25    | C             | T                | 0.09 | 1.13       |
| rs704017   | 10q22.3  | G             | A                | 0.57 | 1.06       |
| rs174537   | 11q12.2  | T             | G                | 0.57 | 1.40       |
| rs3802842  | 11q23.1  | C             | A                | 0.29 | 1.11       |
| rs3824999  | 11q13.4  | G             | T                | 0.50 | 1.08       |
| rs10774214 | 12p13.32 | T             | C                | 0.38 | 1.09       |
| rs11169552 | 12q13.13 | C             | T                | 0.72 | 1.09       |
| rs3184504  | 12q24.12 | C             | T                | 0.53 | 1.09       |
| rs3217810  | 12p13.32 | T             | C                | 0.16 | 1.20       |
| rs3217901  | 12p13.32 | G             | A                | 0.41 | 1.10       |
| rs59336    | 12q24.21 | T             | A                | 0.48 | 1.09       |
| rs7136702  | 12q13.13 | T             | C                | 0.35 | 1.06       |
| rs73208120 | 12q24.22 | G             | T                | 0.11 | 1.16       |
| rs1957636  | 14q22.2  | T             | C                | 0.40 | 1.08       |
| rs4444235  | 14q22.2  | C             | T                | 0.46 | 1.11       |

|            |          |   |   |      |      |
|------------|----------|---|---|------|------|
| rs11632715 | 15q13.3  | A | G | 0.47 | 1.12 |
| rs16969681 | 15q13.3  | T | C | 0.09 | 1.18 |
| rs16941835 | 16q22.1  | C | G | 0.21 | 1.15 |
| rs9929218  | 16q22.1  | G | A | 0.71 | 1.10 |
| rs744166   | 17q21    | G | A | 0.42 | 1.27 |
| rs4939827  | 18q21.1  | T | C | 0.52 | 1.18 |
| rs10411210 | 19q13.11 | C | T | 0.90 | 1.15 |
| rs1800469  | 19q13.2  | G | A | 0.49 | 1.16 |
| rs11204472 | 20q13.33 | A | G | 0.68 | 1.08 |
| rs2423279  | 20p12.3  | C | T | 0.30 | 1.14 |
| rs4813802  | 20p12.3  | G | T | 0.36 | 1.09 |
| rs6066825  | 20q13.1  | A | G | 0.64 | 1.09 |
| rs961253   | 20p12.3  | A | C | 0.36 | 1.12 |

---

Abbreviations: EAF, effect allele frequency
