# Supplementary material for: Ability of known colorectal cancer susceptibility SNPs to predict colorectal cancer risk: A cohort study within the UK Biobank
Source: PubMed Central journal article supplement (PMC8443076; doi:10.1371/journal.pone.0251469), 2021-09-15
Supplement: pone.0251469.s002.pdf [file pone.0251469.s002.pdf]

**S2 Table: Standardised incidence ratios (SIR) by age group for full lifetime and 10-year risk (combined model)**

|                                        | Observed | Expected | SIR    | 95% CI    |
|----------------------------------------|----------|----------|--------|-----------|
| <b>Full lifetime risk: 40–49 years</b> |          |          |        |           |
| Bottom 10%                             | 5        | 6.67     | 0.75   | 0.31–1.80 |
| Decile 2                               | 2        | 6.81     | 0.29   | 0.07–1.17 |
| Decile 3                               | 9        | 6.95     | 1.29   | 0.67–2.48 |
| Decile 4                               | 6        | 7.03     | 0.85   | 0.38–1.89 |
| Decile 5                               | 7        | 6.96     | 1.00   | 0.48–2.11 |
| Decile 6                               | 14       | 7.15     | 1.95   | 1.15–3.30 |
| Decile 7                               | 5        | 7.04     | 0.71   | 0.29–1.70 |
| Decile 8                               | 9        | 7.06     | 1.27   | 0.66–2.45 |
| Decile 9                               | 13       | 7.08     | 1.83   | 1.06–3.16 |
| Top 10%                                | 12       | 6.96     | 1.72   | 0.98–3.03 |
| <b>Full lifetime risk: 50–59 years</b> |          |          |        |           |
| Bottom 10%                             | 32       | 42.32    | 0.75   | 0.53–1.07 |
| Decile 2                               | 27       | 43.94    | 0.6145 | 0.42–0.89 |
| Decile 3                               | 40       | 44.81    | 0.8927 | 0.65–1.21 |
| Decile 4                               | 63       | 45.42    | 1.3871 | 1.08–1.77 |
| Decile 5                               | 46       | 47.32    | 0.972  | 0.72–1.29 |
| Decile 6                               | 49       | 46.65    | 1.0503 | 0.79–1.39 |
| Decile 7                               | 54       | 47.73    | 1.1314 | 0.86–1.47 |
| Decile 8                               | 47       | 49.22    | 0.9548 | 0.71–1.27 |
| Decile 9                               | 62       | 48.89    | 1.2681 | 0.98–1.62 |
| Top 10%                                | 80       | 50.61    | 1.58   | 1.27–1.96 |
| <b>Full lifetime risk: 60–69 years</b> |          |          |        |           |
| Bottom 10%                             | 106      | 147.22   | 0.72   | 0.59–0.87 |
| Decile 2                               | 98       | 161.11   | 0.60   | 0.5–0.74  |
| Decile 3                               | 103      | 172.62   | 0.59   | 0.49–0.72 |
| Decile 4                               | 158      | 181.87   | 0.86   | 0.74–1.01 |
| Decile 5                               | 155      | 186.32   | 0.83   | 0.71–0.97 |

|                                        | <b>Observed</b> | <b>Expected</b> | <b>SIR</b> | <b>95% CI</b> |
|----------------------------------------|-----------------|-----------------|------------|---------------|
| Decile 6                               | 163             | 193.28          | 0.84       | 0.72–0.98     |
| Decile 7                               | 176             | 199.1           | 0.88       | 0.76–1.02     |
| Decile 8                               | 204             | 202.27          | 1.00       | 0.88–1.15     |
| Decile 9                               | 217             | 210.48          | 1.03       | 0.90–1.17     |
| Top 10%                                | 285             | 218.90          | 1.30       | 1.16–1.46     |
| <b>Full lifetime risk: 70–75 years</b> |                 |                 |            |               |
| Bottom 10%                             | 35              | 63.67           | 0.55       | 0.39–0.76     |
| Decile 2                               | 61              | 72.08           | 0.84       | 0.65–1.08     |
| Decile 3                               | 73              | 76.38           | 0.95       | 0.76–1.20     |
| Decile 4                               | 74              | 79.89           | 0.92       | 0.73–1.16     |
| Decile 5                               | 63              | 83.17           | 0.75       | 0.59–0.97     |
| Decile 6                               | 64              | 87.03           | 0.73       | 0.57–0.94     |
| Decile 7                               | 61              | 89.5            | 0.68       | 0.53–0.87     |
| Decile 8                               | 92              | 92.89           | 0.99       | 0.80–1.21     |
| Decile 9                               | 101             | 96.68           | 1.04       | 0.86–1.27     |
| Top 10%                                | 121             | 102.09          | 1.18       | 0.99–1.41     |
| <b>10-year risk: 40–49 years</b>       |                 |                 |            |               |
| Bottom 10%                             | 26              | 36.63           | 0.71       | 0.48–1.04     |
| Decile 2                               | 33              | 18.17           | 1.81       | 1.29–2.55     |
| Decile 3                               | 14              | 7.95            | 1.76       | 1.04–2.97     |
| Decile 4                               | 6               | 3.54            | 1.69       | 0.76–3.77     |
| Decile 5                               | 0               | 1.7             | 0          | –             |
| Decile 6                               | 2               | 0.86            | 2.33       | 0.58–9.32     |
| Decile 7                               | 0               | 0.47            | 0          | –             |
| Decile 8                               | 1               | 0.25            | 4.07       | 0.57–28.93    |
| Decile 9                               | 0               | 0.13            | 0          | –             |
| Top 10%                                | 0               | 0.04            | 0          | –             |
| <b>10-year risk: 50–59 years</b>       |                 |                 |            |               |
| Bottom 10%                             | 23              | 35.10           | 0.65       | 0.43–0.98     |
| Decile 2                               | 63              | 80.37           | 0.78       | 0.61–1.00     |
| Decile 3                               | 88              | 85.03           | 1.03       | 0.84–1.27     |
| Decile 4                               | 84              | 72.01           | 1.16       | 0.94–1.44     |

|                                  | <b>Observed</b> | <b>Expected</b> | <b>SIR</b> | <b>95% CI</b> |
|----------------------------------|-----------------|-----------------|------------|---------------|
| Decile 5                         | 56              | 57.57           | 0.97       | 0.74–1.26     |
| Decile 6                         | 56              | 44.27           | 1.26       | 0.97–1.64     |
| Decile 7                         | 40              | 34.49           | 1.16       | 0.85–1.58     |
| Decile 8                         | 44              | 27.02           | 1.62       | 1.21–2.18     |
| Decile 9                         | 29              | 19.51           | 1.48       | 1.03–2.13     |
| Top 10%                          | 17              | 11.54           | 1.47       | 0.91–2.37     |
| <b>10-year risk: 60–69 years</b> |                 |                 |            |               |
| Bottom 10%                       | 0               | 1.14            | 0          | –             |
| Decile 2                         | 19              | 27.81           | 0.68       | 0.43–1.07     |
| Decile 3                         | 74              | 90.6            | 0.81       | 0.65–1.02     |
| Decile 4                         | 90              | 153.13          | 0.58       | 0.47–0.72     |
| Decile 5                         | 142             | 200.97          | 0.70       | 0.60–0.83     |
| Decile 6                         | 196             | 239.53          | 0.81       | 0.71–0.94     |
| Decile 7                         | 199             | 266.59          | 0.74       | 0.65–0.85     |
| Decile 8                         | 258             | 284.76          | 0.90       | 0.80–1.02     |
| Decile 9                         | 311             | 298.77          | 1.04       | 0.93–1.16     |
| Top 10%                          | 376             | 309.88          | 1.21       | 1.09–1.34     |
| <b>10-year risk: 70–75 years</b> |                 |                 |            |               |
| Bottom 10%                       | –               | –               | –          | –             |
| Decile 2                         | 2               | 0.41            | 4.82       | 1.20–19.3038  |
| Decile 3                         | 4               | 7.78            | 0.51       | 0.19–1.37     |
| Decile 4                         | 14              | 26.49           | 0.52       | 0.31–0.89     |
| Decile 5                         | 38              | 52.34           | 0.72       | 0.52–0.99     |
| Decile 6                         | 62              | 82.54           | 0.75       | 0.58–0.96     |
| Decile 7                         | 98              | 111.26          | 0.88       | 0.72–1.07     |
| Decile 8                         | 117             | 143.85          | 0.81       | 0.67–0.97     |
| Decile 9                         | 146             | 180.03          | 0.81       | 0.69–0.95     |
| Top 10%                          | 264             | 238.69          | 1.10       | 0.98–1.24     |

Abbreviation: SIR, standardised incidence ratio
